# Supplementary material for: ApoL6 associates with lipid droplets and disrupts Perilipin1-HSL interaction to inhibit lipolysis
Source: PubMed Central journal article supplement (PMC10762002; doi:10.1038/s41467-023-44559-3), 2024-01-02
Supplement: 41467_2023_44559_MOESM2_ESM.pdf [file 41467_2023_44559_MOESM2_ESM.pdf]

## Reporting Summary

Nature Portfolio wishes to improve the reproducibility of the work that we publish. This form provides structure for consistency and transparency in reporting. For further information on Nature Portfolio policies, see our [Editorial Policies](#) and the [Editorial Policy Checklist](#).

### Statistics

For all statistical analyses, confirm that the following items are present in the figure legend, table legend, main text, or Methods section.

n/a Confirmed

- The exact sample size ( $n$ ) for each experimental group/condition, given as a discrete number and unit of measurement
- A statement on whether measurements were taken from distinct samples or whether the same sample was measured repeatedly
- The statistical test(s) used AND whether they are one- or two-sided  
*Only common tests should be described solely by name; describe more complex techniques in the Methods section.*
- A description of all covariates tested
- A description of any assumptions or corrections, such as tests of normality and adjustment for multiple comparisons
- A full description of the statistical parameters including central tendency (e.g. means) or other basic estimates (e.g. regression coefficient) AND variation (e.g. standard deviation) or associated estimates of uncertainty (e.g. confidence intervals)
- For null hypothesis testing, the test statistic (e.g.  $F$ ,  $t$ ,  $r$ ) with confidence intervals, effect sizes, degrees of freedom and  $P$  value noted  
*Give  $P$  values as exact values whenever suitable.*
- For Bayesian analysis, information on the choice of priors and Markov chain Monte Carlo settings
- For hierarchical and complex designs, identification of the appropriate level for tests and full reporting of outcomes
- Estimates of effect sizes (e.g. Cohen's  $d$ , Pearson's  $r$ ), indicating how they were calculated

*Our web collection on [statistics for biologists](#) contains articles on many of the points above.*

### Software and code

Policy information about [availability of computer code](#)

Data collection

Data analysis

For manuscripts utilizing custom algorithms or software that are central to the research but not yet described in published literature, software must be made available to editors and reviewers. We strongly encourage code deposition in a community repository (e.g. GitHub). See the Nature Portfolio [guidelines for submitting code & software](#) for further information.

### Data

Policy information about [availability of data](#)

All manuscripts must include a [data availability statement](#). This statement should provide the following information, where applicable:

- Accession codes, unique identifiers, or web links for publicly available datasets
- A description of any restrictions on data availability
- For clinical datasets or third party data, please ensure that the statement adheres to our [policy](#)

## Human research participants

Policy information about [studies involving human research participants and Sex and Gender in Research](#).

|                             |                                  |
|-----------------------------|----------------------------------|
| Reporting on sex and gender | <input type="text" value="N/A"/> |
| Population characteristics  | <input type="text" value="N/A"/> |
| Recruitment                 | <input type="text" value="N/A"/> |
| Ethics oversight            | <input type="text" value="N/A"/> |

Note that full information on the approval of the study protocol must also be provided in the manuscript.

## Field-specific reporting

Please select the one below that is the best fit for your research. If you are not sure, read the appropriate sections before making your selection.

Life sciences       Behavioural & social sciences       Ecological, evolutionary & environmental sciences

For a reference copy of the document with all sections, see [nature.com/documents/nr-reporting-summary-flat.pdf](https://www.nature.com/documents/nr-reporting-summary-flat.pdf)

## Life sciences study design

All studies must disclose on these points even when the disclosure is negative.

|                 |                                                                                                                                                                                                       |
|-----------------|-------------------------------------------------------------------------------------------------------------------------------------------------------------------------------------------------------|
| Sample size     | <input type="text" value="The sample size was large enough to determine statistically significant effects and was determined based upon other studies with similar methodologies (PMID: 32034158)."/> |
| Data exclusions | <input type="text" value="No data were excluded from analysis."/>                                                                                                                                     |
| Replication     | <input type="text" value="Experiments were repeated independently at least 2-3 times and successfully reproducible."/>                                                                                |
| Randomization   | <input type="text" value="Mice (age and sex matched) and cells were randomly assigned to different treatment groups."/>                                                                               |
| Blinding        | <input type="text" value="Blind test was performed for data collection and analysis."/>                                                                                                               |

## Reporting for specific materials, systems and methods

We require information from authors about some types of materials, experimental systems and methods used in many studies. Here, indicate whether each material, system or method listed is relevant to your study. If you are not sure if a list item applies to your research, read the appropriate section before selecting a response.

### Materials & experimental systems

| n/a                                 | Involved in the study                                           |
|-------------------------------------|-----------------------------------------------------------------|
| <input type="checkbox"/>            | <input checked="" type="checkbox"/> Antibodies                  |
| <input type="checkbox"/>            | <input checked="" type="checkbox"/> Eukaryotic cell lines       |
| <input checked="" type="checkbox"/> | <input type="checkbox"/> Palaeontology and archaeology          |
| <input type="checkbox"/>            | <input checked="" type="checkbox"/> Animals and other organisms |
| <input checked="" type="checkbox"/> | <input type="checkbox"/> Clinical data                          |
| <input checked="" type="checkbox"/> | <input type="checkbox"/> Dual use research of concern           |

### Methods

| n/a                                 | Involved in the study                           |
|-------------------------------------|-------------------------------------------------|
| <input checked="" type="checkbox"/> | <input type="checkbox"/> ChIP-seq               |
| <input checked="" type="checkbox"/> | <input type="checkbox"/> Flow cytometry         |
| <input checked="" type="checkbox"/> | <input type="checkbox"/> MRI-based neuroimaging |

## Antibodies

|                 |                                                                                                                                                                                                                                             |
|-----------------|---------------------------------------------------------------------------------------------------------------------------------------------------------------------------------------------------------------------------------------------|
| Antibodies used | <input type="text" value="ApoL6 Rabbit Ab lab generated&lt;br/&gt;perilipin goat Ab abcam ab61682&lt;br/&gt;perilipin Rabbit Ab Cell Signaling 9349s&lt;br/&gt;ATGL Rabbit Ab Cell Signaling 2138s&lt;br/&gt;HSL Ab Cell Signaling 4107s"/> |
|-----------------|---------------------------------------------------------------------------------------------------------------------------------------------------------------------------------------------------------------------------------------------|

CGI58 Ab Santa Cruz Bio sc-102285  
 C/EBPa Ab Santa Cruz Bio sc-61x  
 PPARg Ab Santa Cruz Bio sc-7273x  
 GAPDH Ab Santa Cruz Bio sc-47724  
 ApoL6 Rabbit Ab lab generated  
 perilipin goat Ab abcam ab61682  
 perilipin Rabbit Ab Cell Signaling 9349s  
 ATGL Rabbit Ab Cell Signaling 2138s  
 HSL Ab Cell Signaling 4107s  
 CGI58 Ab Santa Cruz Bio sc-102285  
 C/EBPa Ab Santa Cruz Bio sc-61x  
 PPARg Ab Santa Cruz Bio sc-7273x  
 GAPDH Ab Santa Cruz Bio sc-47724

Validation

The validation statements of commercial antibodies were validated using 293FT lysates overexpressing cDNAs

## Eukaryotic cell lines

Policy information about [cell lines and Sex and Gender in Research](#)

Cell line source(s)

HEK293T(CRL-1573) , 3T3L1 cells, primary human subcutaneous fibroblasts were obtained from ATCC.

Authentication

Both cell lines were authenticated by lipid accumulation during adipogenesis by RT-qPCR analysis.

Mycoplasma contamination

Cells were tested to be negative for mycoplasma contamination by PCR screening.

Commonly misidentified lines  
 (See [ICLAC](#) register)

None

## Animals and other research organisms

Policy information about [studies involving animals; ARRIVE guidelines](#) recommended for reporting animal research, and [Sex and Gender in Research](#)

Laboratory animals

8~25 weeks old C57BL/6 wild type mice were used. aP2-ApoL6 TG, Adiponectin-ApoL6 TG, Crispr ApoL6 KO were backcrossed to C57BL/6 more than 4 generations. Animals were housed at 23C. TG and KO were compared to their wildtype littermates.

Wild animals

N/A

Reporting on sex

We performed experiments with both males and females. We here only presented data obtained from males. When we performed some experiments (body weight, tissue distribution etc) with females, we obtained similar results; There was no difference in sex.

Field-collected samples

N/A

Ethics oversight

All the methods involving live mice were carried out in accordance with the approved guidelines. All experiments protocols were approved by the Animal Care and Use Committee (AUP-2016-11-9317-2) at UC Berkeley.

Note that full information on the approval of the study protocol must also be provided in the manuscript.
